# Supplementary material
Source: ML conference proceedings conference paper supplement (https://proceedings.mlr.press/v80/taylor18a.html)
Supplement: Supplementary file [file taylor18a-supp.pdf]

## A. Proof of Theorem 7 (Sampled Positive Definite Quadratics)

We begin by noting that  $\sigma$  is positive definite if and only if the optimal value of the following problem is positive for any value of  $\varepsilon > 0$ ,

$$\inf_{\xi} \sigma(\xi)$$

$$\text{s.t.} \begin{cases} (\mathbf{x}, \mathbf{g}, \mathbf{f}) \text{ as in (16) generated by method } (\mathcal{M}) \\ \text{applied to } f \in \mathcal{F}_{\mu,L}, \\ \|\xi\| \geq \varepsilon. \end{cases}$$

Next, we discretize the problem by replacing  $f \in \mathcal{F}_{\mu,L}$  with the equivalent condition that the discrete set of points  $\{(y_i, g_i, f_i)\}_{i \in \mathcal{I}_K}$  is  $\mathcal{F}_{\mu,L}$ -interpolable (recall that  $\mathcal{I}_K = \{0, \dots, K, \star\}$ ). Choosing a specific notion of distance for  $\xi$ , we can reformulate the previous statement as verifying that  $p_{\star}^{(d)}(\varepsilon) > 0$  for all  $\varepsilon > 0$  where

$$p_{\star}^{(d)}(\varepsilon) := \min_{\mathbf{x}, \mathbf{g}, \mathbf{f}} \sigma(\xi)$$

$$\text{s.t.} \begin{cases} \{(y_i, g_i, f_i)\}_{i \in \mathcal{I}_K} \text{ is } \mathcal{F}_{\mu,L}\text{-interpolable,} \\ (\mathbf{x}, \mathbf{g}, \mathbf{f}) \text{ as in (16) generated by } (\mathcal{M}), \\ \|\mathbf{x}\|^2 + \|\mathbf{g}\|^2 + \mathbf{1}^T \mathbf{f} = \varepsilon. \end{cases}$$

Note that the last condition can equivalently be replaced by others (e.g.,  $\|\mathbf{x}\|^2 = \varepsilon$  or  $\|\mathbf{g}\|^2 = \varepsilon$  or  $\mathbf{1}^T \mathbf{f} = \varepsilon$ ), and that the optimal value of this problem is attained (using a short homogeneity argument with respect to  $\varepsilon$ ). Using the necessary and sufficient conditions for the set of points  $\{(y_i, g_i, f_i)\}_{i \in \mathcal{I}_K}$  to be  $\mathcal{F}_{\mu,L}$ -interpolable from Theorem 6, we have

$$p_{\star}^{(d)}(\varepsilon) = \min_{\mathbf{x}, \mathbf{g}, \mathbf{f}} \sigma(\xi)$$

$$\text{s.t.} \begin{cases} \phi_{ij} \geq 0 \text{ for all } i, j \in \mathcal{I}_K, \\ (\mathbf{x}, \mathbf{g}, \mathbf{f}) \text{ as in (16) generated by } (\mathcal{M}), \\ \|\mathbf{x}\|^2 + \|\mathbf{g}\|^2 + \mathbf{1}^T \mathbf{f} = \varepsilon. \end{cases}$$

Next, we define the Gram matrix  $\mathbf{G} \in \mathbb{S}^{N+K+2}$  as  $\mathbf{G} := \mathbf{B}^T \mathbf{B}$  where

$$\mathbf{B} := [x_{-N} - x_{\star} \quad \dots \quad x_0 - x_{\star} \quad g_0 \quad \dots \quad g_K], \quad (24)$$

hence  $\mathbf{G}$  is a standard Gram matrix containing all inner products between  $x_i - x_{\star}$  for  $i \in \{-N, \dots, 0\}$  and  $g_i$  for  $i \in \{0, \dots, K\}$ . Note that the quadratic  $\sigma$  can be written as a function of the Gram matrix as

$$\sigma(\mathbf{G}, \mathbf{f}) = \text{tr}(\mathbf{Q}\mathbf{G}) + q^T \mathbf{f}.$$

Similarly, the interpolation conditions can also be reformulated with the Gram matrix as

$$0 \leq \phi_{ij}(\mathbf{G}, \mathbf{f}) = \text{tr}(M_{ij}\mathbf{G}) + m_{ij}^T \mathbf{f}$$

where  $M_{ij}$  and  $m_{ij}$  are such that

$$\phi_{ij} = \begin{bmatrix} \mathbf{x} \\ \mathbf{g} \end{bmatrix}^T (M_{ij} \otimes I_d) \begin{bmatrix} \mathbf{x} \\ \mathbf{g} \end{bmatrix} + m_{ij}^T \mathbf{f},$$

for all  $i, j \in \mathcal{I}_K$  (hence also  $\star$  is in the index set). Therefore, we can reformulate the previous problem as the following rank-constrained semidefinite program:

$$p_{\star}^{(d)}(\varepsilon) = \min_{\mathbf{G} \in \mathbb{S}^{N+K+2}, \mathbf{f} \in \mathbb{R}^{N+1}} \text{tr}(\mathbf{Q}\mathbf{G}) + q^T \mathbf{f}$$

$$\text{s.t.} \begin{cases} 0 \leq \text{tr}(M_{ij}\mathbf{G}) + m_{ij}^T \mathbf{f} \text{ for } i, j \in \mathcal{I}, \\ \text{tr}(\mathbf{G}) + \mathbf{1}^T \mathbf{f} = \varepsilon, \\ \mathbf{f} \geq 0, \\ \mathbf{G} \succeq 0, \\ \text{Rank}(\mathbf{G}) \leq d, \end{cases}$$

where we remind the reader that  $d$  is the dimension of the optimization problem ( $\mathcal{P}$ ). Therefore, as discussed in (Taylor et al., 2017c;b), if we want a result that does not depend on the dimension (i.e., a  $\sigma$  that is positive definite whatever the value of  $d$ ), we have to verify that  $p^{(\infty)}(\varepsilon) > 0$  (which corresponds to assuming that  $d \geq N+K+2$  since this is the dimension of  $\mathbf{G}$ ). We then have the following semidefinite program:

$$p_{\star}^{(\infty)}(\varepsilon) = \min_{\mathbf{G} \in \mathbb{S}^{N+K+2}, \mathbf{f} \in \mathbb{R}^{N+1}} \text{tr}(\mathbf{Q}\mathbf{G}) + q^T \mathbf{f}$$

$$\text{s.t.} \begin{cases} 0 \leq \text{tr}(M_{ij}\mathbf{G}) + m_{ij}^T \mathbf{f} \text{ for } i, j \in \mathcal{I}, \\ \text{tr}(\mathbf{G}) + \mathbf{1}^T \mathbf{f} = \varepsilon, \\ \mathbf{f} \geq 0, \\ \mathbf{G} \succeq 0. \end{cases}$$

A Slater point for this problem (i.e., a feasible point such that  $\mathbf{G} \succ 0$ ) is obtained in the following section, so the optimal value of the primal problem is equal to the optimal value of the dual, which is given by

$$d^{(\infty)}(\varepsilon) := \max_{\{\lambda_{ij}\}, \nu} \nu \varepsilon$$

$$\text{s.t.} \begin{cases} \lambda_{ij} \geq 0 \text{ for all } i, j \in \mathcal{I}, \\ \mathbf{Q} - \sum_{i,j \in \mathcal{I}} \lambda_{ij} M_{ij} \succeq \nu \mathbf{I}_{N+K+2}, \\ q - \sum_{i,j \in \mathcal{I}} \lambda_{ij} m_{ij} \geq \nu \mathbf{1}_{N+1}. \end{cases}$$

The theorem is then proved by noting the equivalence

$$p^{(\infty)}(\varepsilon) > 0, \forall \varepsilon > 0 \iff d^{(\infty)}(\varepsilon) > 0, \forall \varepsilon > 0,$$

where the last statement amounts to verifying that

$$\mathbf{Q} - \sum_{i,j \in \mathcal{I}} \lambda_{ij} M_{ij} \succ 0, \quad q - \sum_{i,j \in \mathcal{I}} \lambda_{ij} m_{ij} > 0. \quad \blacksquare$$

## B. Slater Point for Proof of Theorem 7

In this section, we show how to construct a Slater point (Boyd & Vandenberghe, 2004) for the primal semidefinite program in the proof of Theorem 7. The construction

is similar to Section 2.1.2 of (Nesterov, 2004) and the proof of Theorem 6 in (Taylor et al., 2017c).

Consider applying the first-order iterative fixed-step method ( $\mathcal{M}$ ) with  $\alpha \neq 0$  and  $\gamma_0 \neq 0$  for  $K$  iterations to the function  $f(x) = \frac{1}{2}x^\top Hx$  where  $H \in \mathbb{S}^d$  with  $d \geq N + K + 2$  is the positive definite tridiagonal matrix defined by

$$[H]_{ij} = \begin{cases} 2 & \text{if } i = j \\ 1 & \text{if } |i - j| = 1 \\ 0 & \text{otherwise} \end{cases}$$

which has maximum eigenvalue  $L = 2 + 2 \cos(\pi/(d+1))$ . Define the matrix  $\mathbf{B}$  in (24). Using the initial condition  $x_i = e_{N+1+i}$  for  $i = -N, \dots, 0$ , we will show that  $\mathbf{B}$  is upper triangular with nonzero diagonal elements, and hence full rank.

Since  $\gamma_0 \neq 0$ ,  $y_0$  has a nonzero element corresponding to  $e_{N+1}$ . Then  $g_0 = Hy_0$  has a nonzero element corresponding to  $e_{N+2}$  due to the tridiagonal structure of  $H$ . Furthermore,  $y_0$  may only have nonzero elements corresponding to  $e_j$  for  $j = 1, \dots, N+1$ , so  $g_0$  must have zero components corresponding to  $e_j$  for all  $j > N+2$ .

We now continue by induction. Assume that  $g_k$  has a nonzero element corresponding to  $e_{N+2+k}$  and zero elements corresponding to  $e_i$  for all  $i > N+2+k$ . Since  $\alpha \neq 0$ ,  $x_{k+1}$  has a nonzero element corresponding to  $e_{N+2+k}$  and zero elements corresponding to  $e_i$  for all  $i > N+2+k$ . Then since  $\gamma_0 \neq 0$ ,  $y_{k+1}$  also has the same structure. Due to the tridiagonal structure of  $H$ ,  $g_{k+1}$  then has a nonzero element corresponding to  $e_{N+3+k}$  and zero elements corresponding to  $e_i$  for all  $i > N+3+k$ . Therefore, by induction we have shown that for all  $k \geq 0$ ,  $g_k$  has a nonzero element corresponding to  $e_{N+2+k}$  and zero elements corresponding to  $e_i$  for all  $i > N+2+k$ . For  $P$  to be upper triangular, we need  $g_K$  to have dimension at least  $N+2+K$ . Thus, if  $d \geq N+2+K$  where  $K$  is the number of iterations, then  $\mathbf{B}$  is upper triangular with nonzero entries on the diagonal, and therefore has full rank.

In order to make the statement hold for general  $\mu < L$ , observe that the tridiagonal structure of  $H$  is preserved under the operation

$$\tilde{H} = (H - \lambda_{\min}(H)I) \frac{L - \mu}{\lambda_{\max}(H) - \lambda_{\min}(H)} + \mu I$$

where  $\mu I \preceq \tilde{H} \preceq LI$ .

Since  $\mathbf{B}$  has full rank, the Gram matrix  $\mathbf{G} = \mathbf{B}^\top \mathbf{B} \succ 0$  is positive definite. Therefore, the primal semidefinite program satisfies Slater's condition.

## C. Steepest Descent

In this section, we show a similar formulation as ( $\rho$ -SDP) for steepest descent. In this case, the analysis was not *a priori* guaranteed to be tight, due to the line search conditions. In order to encode the line search, we use the corresponding optimality conditions, as in (de Klerk et al., 2017):

$$\begin{aligned} \langle x_{k+1} - x_k, g_{k+1} \rangle &= 0, \\ \langle g_k, g_{k+1} \rangle &= 0, \end{aligned} \quad (25)$$

with  $g_k = \nabla f(x_k)$ . For the Lyapunov function structure, we choose the following

$$V(\xi_k) = \begin{bmatrix} x_k - x_* \\ g_k \end{bmatrix} (P \otimes I_d) \begin{bmatrix} x_k - x_* \\ g_k \end{bmatrix}^\top + p(f_k - f_*).$$

In order to develop a SDP formulation for this problem we follow the same steps as for ( $\rho$ -SDP), starting with **Step 1** (see Section 4.2): we define the following row vectors in  $\mathbb{R}^2$

$$\bar{y}_0^{(0)} := \mathbf{e}_1^\top, \bar{x}_0^{(0)} := \mathbf{e}_1^\top, \bar{g}_0^{(0)} := \mathbf{e}_2^\top,$$

and  $\bar{y}_*^{(0)} = \bar{x}_*^{(0)} = \bar{g}_*^{(0)} := \mathbf{0}^\top$ , along with the scalars  $\bar{f}_0^{(0)} := 1$  and  $\bar{f}_*^{(0)} := 0$ . In addition, we use the following vectors in  $\mathbb{R}^4$

$$\begin{aligned} \bar{x}_0^{(1)} &:= \mathbf{e}_1^\top, \bar{x}_1^{(1)} := \mathbf{e}_2^\top, \\ \bar{y}_0^{(1)} &:= \mathbf{e}_2^\top, \bar{y}_1^{(1)} := \mathbf{e}_2^\top, \\ \bar{g}_0^{(1)} &:= \mathbf{e}_3^\top, \bar{g}_1^{(1)} := \mathbf{e}_4^\top, \end{aligned}$$

and  $\bar{y}_*^{(1)} = \bar{x}_*^{(1)} = \bar{g}_*^{(1)} := \mathbf{0}^\top$ , along with  $\bar{f}_0^{(1)}, \bar{f}_1^{(1)}, \bar{f}_*^{(1)} \in \mathbb{R}^2$  such that  $\bar{f}_0^{(1)} := \mathbf{e}_1^\top, \bar{f}_1^{(1)} := \mathbf{e}_2^\top$  and  $\bar{f}_*^{(1)} := \mathbf{0}^\top$ .

Because of the algorithm, **Step 2** is slightly different as before; we encode the line search constraints (25) using

$$\begin{aligned} A_1 &= \begin{bmatrix} \bar{x}_0^{(1)} \\ \bar{x}_1^{(1)} \\ \bar{g}_1^{(1)} \end{bmatrix}^\top \begin{bmatrix} 0 & 0 & -1 \\ 0 & 0 & 1 \\ -1 & 1 & 0 \end{bmatrix} \begin{bmatrix} \bar{x}_0^{(1)} \\ \bar{x}_1^{(1)} \\ \bar{g}_1^{(1)} \end{bmatrix}, \\ A_2 &= \begin{bmatrix} \bar{g}_0^{(1)} \\ \bar{g}_1^{(1)} \end{bmatrix}^\top \begin{bmatrix} 0 & 1 \\ 1 & 0 \end{bmatrix} \begin{bmatrix} \bar{g}_0^{(1)} \\ \bar{g}_1^{(1)} \end{bmatrix}. \end{aligned}$$

The subsequent steps (**Step 3** and **Step 4**) are exactly the same as in Section 4.2. We finally obtain a slightly modified

version of the feasibility problem ( $\rho$ -SDP):

$$\begin{aligned}
 \text{feasible } & 0 \prec V_0^{(0)} - \sum_{i,j \in \mathcal{I}_0} \lambda_{ij} M_{ij}^{(0)} \\
 & \begin{matrix} P \in \mathbb{S}^2 \\ p \in \mathbb{R}^1 \\ \nu_1, \nu_2 \in \mathbb{R} \\ \{\lambda_{ij}\} \\ \{\eta_{ij}\} \end{matrix} \\
 & 0 < v_0^{(0)} - \sum_{i,j \in \mathcal{I}_0} \lambda_{ij} m_{ij}^{(0)} \\
 & 0 \succeq \Delta V_0^{(1)} + \sum_{i,j \in \mathcal{I}_1} \eta_{ij} M_{ij}^{(1)} + \sum_{i=1}^2 \nu_i A_i \\
 & 0 \geq \Delta v_0^{(1)} + \sum_{i,j \in \mathcal{I}_1} \eta_{ij} m_{ij}^{(1)} \\
 & 0 \leq \lambda_{ij} \quad \text{for } i, j \in \mathcal{I}_0 \\
 & 0 \leq \eta_{ij} \quad \text{for } i, j \in \mathcal{I}_1
 \end{aligned}$$

with  $\mathcal{I}_0 := \{0, \star\}$  and  $\mathcal{I}_1 := \{0, 1, \star\}$ .

## D. SDP for HBM with Subspace Searches

We follow the steps of the previous section for steepest descent; we only make the following adaptations: (i) we look for a quadratic Lyapunov function with the states

$$\begin{aligned}
 V(\xi_k) = & \begin{bmatrix} x_k - x_\star \\ x_{k-1} - x_\star \\ g_k \\ g_{k-1} \end{bmatrix} (P \otimes I_d) \begin{bmatrix} x_k - x_\star \\ x_{k-1} - x_\star \\ g_k \\ g_{k-1} \end{bmatrix}^\top \\
 & + p^\top \begin{bmatrix} f_k - f_\star \\ f_{k-1} - f_\star \end{bmatrix},
 \end{aligned}$$

(ii) we adapt the initialization (**Step 1**), (iii) adapt the line search conditions (**Step 2**) and (iv) obtain a slightly modified version of the SDP.

For (ii), we adapt the initialization procedure (**Step 1**) as follows. We define the following row vectors of  $\mathbb{R}^4$ :

$$\begin{aligned}
 \bar{x}_0^{(1)} & := \mathbf{e}_1^\top, \bar{x}_1^{(1)} := \mathbf{e}_2^\top, \\
 \bar{y}_0^{(1)} & := \mathbf{e}_1^\top, \bar{y}_1^{(1)} := \mathbf{e}_2^\top, \\
 \bar{g}_0^{(1)} & := \mathbf{e}_3^\top, \bar{g}_1^{(1)} := \mathbf{e}_4^\top,
 \end{aligned}$$

along with  $\bar{y}_\star^{(1)} = \bar{x}_\star^{(1)} = \bar{g}_\star^{(1)} := \mathbf{0}^\top$ , and the following in  $\mathbb{R}^2$ :  $\bar{f}_0^{(1)} := \mathbf{e}_1^\top$ ,  $\bar{f}_1^{(1)} := \mathbf{e}_2^\top$  and  $\bar{f}_\star^{(1)} := \mathbf{0}^\top$ . We also define the following row vectors in  $\mathbb{R}^7$ :

$$\begin{aligned}
 \bar{x}_{-1}^{(2)} & := \mathbf{e}_1^\top, \bar{x}_0^{(2)} := \mathbf{e}_2^\top, \bar{x}_1^{(2)} := \mathbf{e}_3^\top, \bar{x}_2^{(2)} := \mathbf{e}_4^\top, \\
 \bar{y}_0^{(2)} & := \bar{x}_0^{(2)}, \bar{y}_1^{(2)} := \bar{x}_1^{(2)}, \bar{y}_2^{(2)} := \bar{x}_2^{(2)}, \\
 \bar{g}_0^{(2)} & := \mathbf{e}_5^\top, \bar{g}_1^{(2)} := \mathbf{e}_6^\top, \bar{g}_2^{(2)} := \mathbf{e}_7^\top,
 \end{aligned}$$

along with  $\bar{y}_\star^{(2)} = \bar{x}_\star^{(2)} = \bar{g}_\star^{(2)} := \mathbf{0}^\top$  and the vectors of  $\mathbb{R}^3$ :  $\bar{f}_0^{(2)} := \mathbf{e}_1^\top$ ,  $\bar{f}_1^{(2)} := \mathbf{e}_2^\top$ ,  $\bar{f}_2^{(2)} := \mathbf{e}_3^\top$  and  $\bar{f}_\star^{(2)} := \mathbf{0}^\top$ .

Now for (iii) (or **Step 2**), optimality of the search conditions can be

$$\begin{aligned}
 \langle x_{k+1} - x_k, g_{k+1} \rangle & = 0, \\
 \langle x_k - x_{k-1}, g_{k+1} \rangle & = 0, \\
 \langle g_k; g_{k+1} \rangle & = 0,
 \end{aligned}$$

which we can formulate in matrix form for  $k \in \{0, 1\}$ :

$$\begin{aligned}
 A_{1+k} & = \begin{bmatrix} \bar{x}_k^{(2)} \\ \bar{x}_{k+1}^{(2)} \\ \bar{g}_{k+1}^{(2)} \end{bmatrix}^\top \begin{bmatrix} 0 & 0 & -1 \\ 0 & 0 & 1 \\ -1 & 1 & 0 \end{bmatrix} \begin{bmatrix} \bar{x}_k^{(2)} \\ \bar{x}_{k+1}^{(2)} \\ \bar{g}_{k+1}^{(2)} \end{bmatrix} \\
 A_{3+k} & = \begin{bmatrix} \bar{x}_{k-1}^{(2)} \\ \bar{x}_k^{(2)} \\ \bar{g}_{k+1}^{(2)} \end{bmatrix}^\top \begin{bmatrix} 0 & 0 & -1 \\ 0 & 0 & 1 \\ -1 & 1 & 0 \end{bmatrix} \begin{bmatrix} \bar{x}_{k-1}^{(2)} \\ \bar{x}_k^{(2)} \\ \bar{g}_{k+1}^{(2)} \end{bmatrix} \\
 A_{5+k} & = \begin{bmatrix} \bar{g}_k^{(2)} \\ \bar{g}_{k+1}^{(2)} \end{bmatrix}^\top \begin{bmatrix} 0 & 1 \\ 1 & 0 \end{bmatrix} \begin{bmatrix} \bar{g}_k^{(2)} \\ \bar{g}_{k+1}^{(2)} \end{bmatrix}
 \end{aligned}$$

The subsequent steps (**Step 3** and **Step 4**) are exactly the same as in Section 4.2. We finally obtain a slightly modified version of the feasibility problem ( $\rho$ -SDP):

$$\begin{aligned}
 \text{feasible } & 0 \prec V_1^{(1)} - \sum_{i,j \in \mathcal{I}_1} \lambda_{ij} M_{ij}^{(1)} \\
 & \begin{matrix} P \in \mathbb{S}^2 \\ p \in \mathbb{R}^1 \\ \nu_1, \dots, \nu_6 \in \mathbb{R} \\ \{\lambda_{ij}\} \\ \{\eta_{ij}\} \end{matrix} \\
 & 0 < v_1^{(1)} - \sum_{i,j \in \mathcal{I}_1} \lambda_{ij} m_{ij}^{(1)} \\
 & 0 \succeq \Delta V_1^{(2)} + \sum_{i,j \in \mathcal{I}_2} \eta_{ij} M_{ij}^{(2)} + \sum_{i=1}^6 \nu_i A_i \\
 & 0 \geq \Delta v_1^{(2)} + \sum_{i,j \in \mathcal{I}_2} \eta_{ij} m_{ij}^{(2)} \\
 & 0 \leq \lambda_{ij} \quad \text{for } i, j \in \mathcal{I}_1 \\
 & 0 \leq \eta_{ij} \quad \text{for } i, j \in \mathcal{I}_2
 \end{aligned}$$

with  $\mathcal{I}_1 := \{0, 1, \star\}$  and  $\mathcal{I}_2 := \{0, 1, 2, \star\}$ . The corresponding results are presented on Figure 3.

## E. SDP for FGM with Scheduled Restarts

This setting goes slightly beyond the fixed-step model presented in  $(\mathcal{M})$ , as the step sizes depend on the iteration. We study the algorithm described by (23), which does  $N$  steps of the standard fast gradient method (Nesterov, 1983) before restarting. We study the convergence of this scheme using quadratic Lyapunov functions of the form

$$\begin{bmatrix} y_k^N - x_\star \\ \nabla f(y_k^N) \end{bmatrix}^\top (P \otimes I_d) \begin{bmatrix} y_k^N - x_\star \\ \nabla f(y_k^N) \end{bmatrix} + p [f(y_k^N) - f(x_\star)]. \quad (26)$$

Let us perform similar steps as for ( $\rho$ -SDP) for constructing the corresponding SDP. We start with the initialization

procedure **Step 1**. Let us define the following row vectors in  $\mathbb{R}^2$ :

$$\bar{y}_0^{(1)} = \bar{x}_0^{(1)} := \mathbf{e}_1^\top, \bar{g}_0^{(1)} := \mathbf{e}_2^\top,$$

and  $\bar{x}_\star^{(1)} = \bar{g}_\star^{(1)} := \mathbf{0}^\top$ , along with the scalars  $f_0^{(1)} := 1$  and  $f_\star^{(1)} := 0$ . In addition, we define the row vectors of  $\mathbb{R}^{N+2}$ :

$$\bar{x}_0^{(N+1)} := \mathbf{e}_1^\top, \bar{g}_k^{(N+1)} := \mathbf{e}_{2+k}^\top,$$

for  $k = 0, \dots, N$ , along with  $\bar{x}_\star^{(N+1)} = \bar{g}_\star^{(N+1)} := \mathbf{0}^\top$  and the row vectors  $\bar{f}_k^{(N+1)} \in \mathbb{R}^{N+1}$  defined as  $\bar{f}_k^{(N+1)} := \mathbf{e}_{1+k}^\top$  and  $\bar{f}_\star^{(N+1)} := \mathbf{0}^\top$ .

**Step 2** Apply one complete loop of the algorithm as follows: for  $k = 0, \dots, N - 1$  define the sequence of row vectors:

$$\begin{aligned} \bar{z}_{k+1}^{(N+1)} &= \bar{y}_k^{(N+1)} - \frac{1}{L} \bar{g}_k^{(N+1)}, \\ \bar{y}_{k+1}^{(N+1)} &= \bar{z}_k^{(N+1)} + \frac{\beta_k - 1}{\beta_{k+1}} (\bar{z}_k^{(N+1)} - \bar{z}_k^{(N+1)}), \end{aligned}$$

with  $\beta_0 := 1$  and  $\beta_{k+1} := \frac{1 + \sqrt{4\beta_k^2 + 1}}{2}$ . For complying with the notations of the paper, we define the sequence

$$x_k^{(K)} := y_k^{(K)}$$

for  $k = 0, \dots, N$  and  $K \in \{1, N + 1\}$ . Then, using the sets  $\mathcal{I}_1 := \{0, \star\}$  and  $\mathcal{I}_{N+1} := \{0, \dots, N, \star\}$ , the other stages follow from the same lines as **Step 3**, and **Step 4** with the slight modification of the expression for the rate

$$\begin{aligned} \Delta v_k^{(N+1)} &:= v_{k+1}^{(N+1)} - \rho^{2N} v_k^{(N+1)}, \\ \Delta V_k^{(N+1)} &:= V_{k+1}^{(N+1)} - \rho^{2N} V_k^{(N+1)}, \end{aligned}$$

and **Step 5** follows as in Section 4.2:

$$\begin{aligned} \text{feasible } P \in \mathbb{S}^{2(N+1)} \\ p \in \mathbb{R}^{N+1} \\ \{\lambda_{ij}\} \\ \{\eta_{ij}\} \end{aligned} \quad \begin{aligned} 0 &< V_1^{(1)} - \sum_{i,j \in \mathcal{I}_1} \lambda_{ij} M_{ij}^{(1)} \\ 0 &< v_1^{(1)} - \sum_{i,j \in \mathcal{I}_1} \lambda_{ij} m_{ij}^{(1)} \\ 0 &\geq \Delta V_N^{(N+1)} + \sum_{i,j \in \mathcal{I}_{N+1}} \eta_{ij} M_{ij}^{(N+1)} \\ 0 &\geq \Delta v_N^{(N+1)} + \sum_{i,j \in \mathcal{I}_{N+1}} \eta_{ij} m_{ij}^{(N+1)} \\ 0 &\leq \lambda_{ij} \quad \text{for } i, j \in \mathcal{I}_1 \\ 0 &\leq \eta_{ij} \quad \text{for } i, j \in \mathcal{I}_{N+1} \end{aligned}$$

(note that the sets  $\mathcal{I}_1$  and  $\mathcal{I}_{N+1}$  should use the definitions of this section). Numerical results are available in Figure 4.
